# Supplementary material
Source: PubMed Central journal article supplement (PMC6626842)
Supplement: mmc1.pdf [file mmc1.pdf]

**Biophysical Journal, Volume 117**

**Supplemental Information**

**A Single Protein Disruption Site Results in Efficient Reassembly by  
Multiple Engineering Methods**

**Jeung-Hoi Ha, Maria F. Presti, and Stewart N. Loh**

**WT RBP:**

KEGKTIGLVIISTLNNPFFVTLKNGAEEKAKELGYKIIVEDSQNDSSKELSNVEDLIQQKVDVLLINPVDS  
AVVTAIKEANSKNIPVITIDRSANGGDVVSHIASDNVKGEMAAEFIAKALKGKGNVVELEGIPGASAARD  
RGKGFDEAIAKY<sup>PD</sup>IKIVAKQAADFDRSKGLSVMENILQAQPKIDAVFAQNDEMALGAIKAIEAANRQGI  
VVGFDGTEDALKAIKEGKMAATIAQQPALMGSLGVEMADKYLKGEKIPNFI PAELKLITKENVQ<sup>NLEHHHHH</sup>  
HHHH

**RBP<sup>1-96</sup>:**

<sup>W</sup>GKEGKTIGLVIISTLNNPFFVTLKNGAEEKAKELGYKIIVEDSQNDSSKELSNVEDLIQQKVDVLLINPVD  
SDAVVTAIKEANSKNIPVITIDRSANG

**RBP<sup>97-277</sup>:**

<sup>GSSHHHHHHSQDPNSSSS</sup>GDVVSHIASDNVKGEMAAEFIAKALKGKGNVVELEGIPGASAARDRGKGFDEA  
IAKY<sup>PD</sup>IKIVAKQAADFDRSKGLSVMENILQAQPKIDAVFAQNDEMALGAIKAIEAANRQGI  
VVGFDGTE  
DALKAIEGKMAATIAQQPALMGSLGVEMADKYLKGEKIPNFI PAELKLITKENVQ<sup>W</sup>

**CyPet-RBP<sup>1-96</sup>:**

<sup>GSKGEELFGGIVPILVELEGDVNGHKFSVSGEGEGDATYGKLTTLKFICTTGKLPVPWPPTLVTTLTWGVQCF</sup>  
<sup>SRYPDHMKQHDFDFKSVMPEGYVQERTIFFKDDGNYKTRAEVKFEGDTLVNRIELKGI</sup><sup>DFKEDGNILGHKLE</sup>  
<sup>YNYISHNVYITADKQKNGIKANFKARHNI</sup><sup>TDGSVQLADHYQQNTPIGDGPVILPDNHYLSTQSALSKDPNE</sup>  
<sup>KRDHMLLEFVTAAGITHGMDELYKGGASG</sup>KEGKTIGLVIISTLNNPFFVTLKNGAEEKAKELGYKIIVEDS  
QNDSSKELSNVEDLIQQKVDVLLINPVDSDAVVTAIKEANSKNIPVITIDRSANG<sup>LEHHHHHHHHH</sup>

**RBP<sup>97-277</sup>-YPet:**

<sup>GSSHHHHHHSQDPNSSSS</sup>GDVVSHIASDNVKGEMAAEFIAKALKGKGNVVELEGIPGASAARDRGKGFDEA  
IAKY<sup>PD</sup>IKIVAKQAADFDRSKGLSVMENILQAQPKIDAVFAQNDEMALGAIKAIEAANRQGI  
VVGFDGTE  
DALKAIEGKMAATIAQQPALMGSLGVEMADKYLKGEKIPNFI PAELKLITKENVQ<sup>ASGGTGMSKGEELFT</sup>  
<sup>GVVPILVELDGDVNGHKFSVSGEGEGDATYGKLTTLKLLCTTGKLPVPWPPTLVTTLGYGVQCFARYPDHMKQ</sup>  
<sup>HDFDFKSAMPEGYVQERTIFFKDDGNYKTRAEVKFEGDTLVNRIELKGI</sup><sup>DFKEDGNILGHKLEYNYNSHNVY</sup>  
<sup>ITADKQKNGIKANFKIRHNI</sup><sup>EDGGVQLADHYQQNTPIGDGPVLLPDNHYLSYQSALFKDPNEKRDHMLLE</sup>  
<sup>FLTAAGITEGMNELYK</sup>

**CP<sup>97</sup>:**

GDVVSHIASDNVKGEMAAEFIAKALKGKGNVVELEGIPGASAARDRGKGFDEAIAKY<sup>PD</sup>IKIVAKQAADF  
DRSKGLSVMENILQAQPKIDAVFAQNDEMALGAIKAIEAANRQGI  
VVGASGTEDALKAIKEGKMAATIAQ  
QPALMGSLGVEMADKYLKGEKIPNFI PAELKLITKENVQ<sup>GGAASGGAAGGSAAASSGAGAAGGSAGGKE</sup>  
GKTIGLVIISTLNNPFFVTLKNGAEEKAKELGYKIIVEDSQNDSSKELSNVEDLIQQKVDVLLINPVDS  
DAVVTAIKEANSKNIPVITIDRSANG

**RU<sup>97</sup>:**

MKEGKTIGLVIISTLNNPFFVTLKNGAEEKAKELGYKIIVEDSQNDSSKELSNVEDLIQQKVDVLLINPVDS  
DAVVTAIKEANSKNIPVITIDRSANG<sup>MQIFVKTLTGKTTITLEVEPSDTIENVKAKIQDKEGIPPDQQLIF</sup>  
<sup>AGKQLEDGR</sup><sup>TLSDYNIQKESTLHLVLRRLRGGGDVVSHIASDNVKGEMAAEFIAKALKGKGNVVELEGIPG</sup>  
<sup>ASAARDRGKGFDEAIAKY</sup><sup>PD</sup><sup>IKIVAKQAADFDRSKGLSVMENILQAQPKIDAVFAQNDEMALGAIKAIEAA</sup>  
<sup>NRQGI</sup><sup>VVGFDGTEDALKAIKEGKMAATIAQQPALMGSLGVEMADKYLKGEKIPNFI PAELKLITK</sup>  
ENVQ<sup>NLEHHHHH</sup>

**Fig. S1. Amino acid sequences of representative constructs used in this study.** His-tag purification sequences are shown in orange, the extra Trp residue (added for concentration determination) in purple, CyPet in cyan, YPet in green, CP linker in red, and ubiquitin underlined.

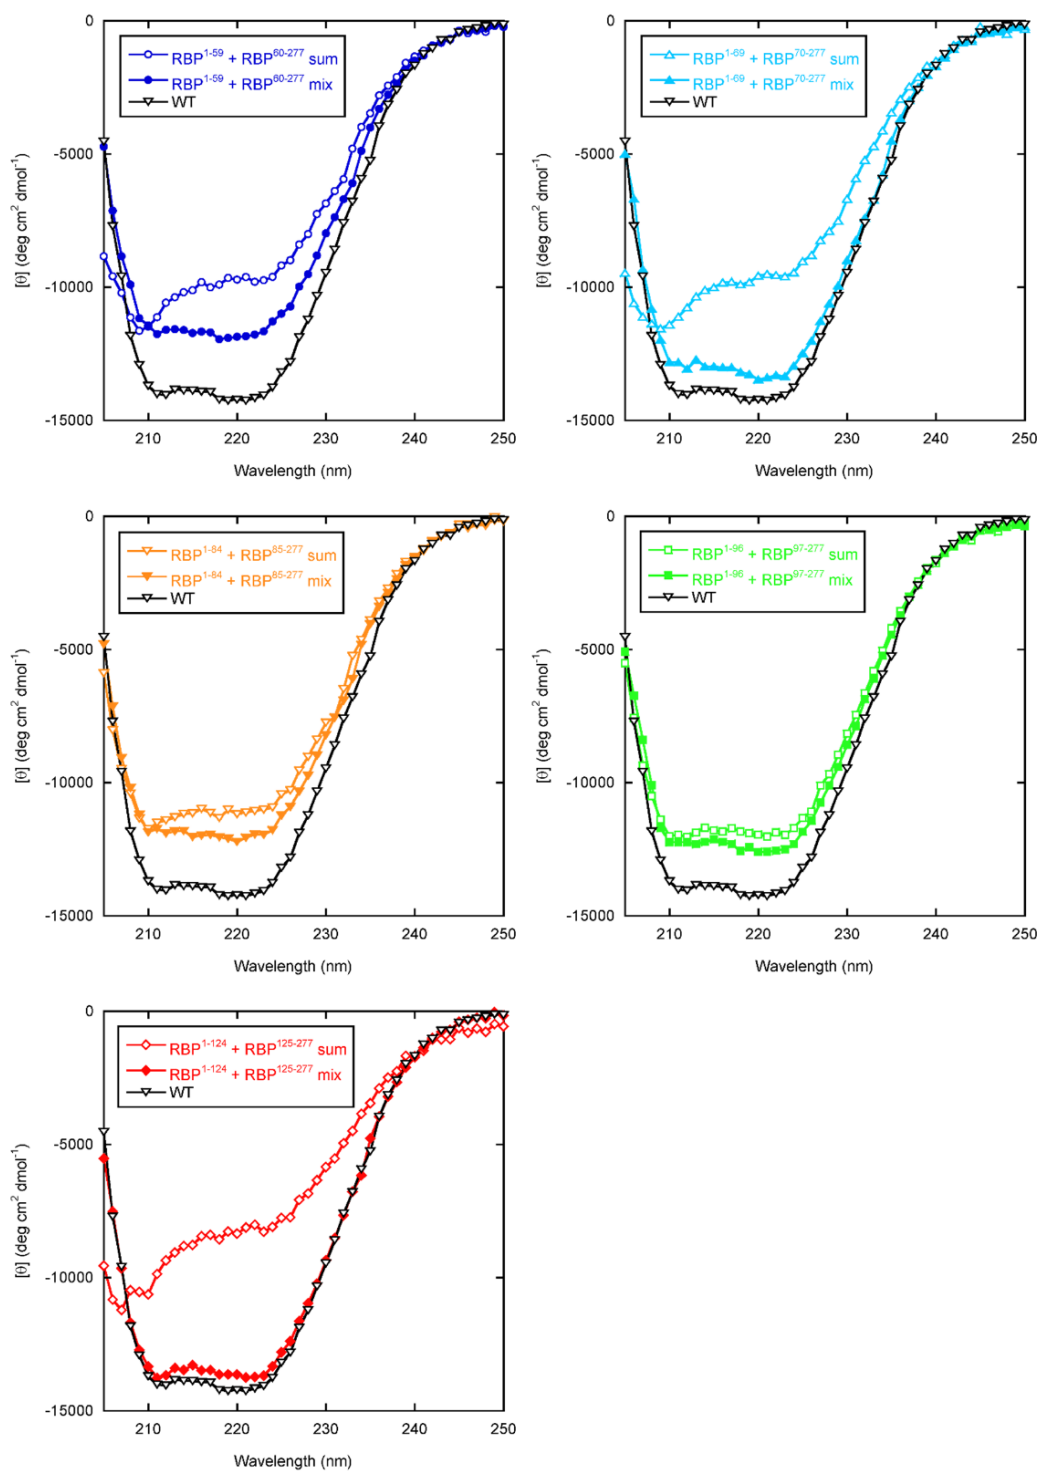

**Fig. S2. Binding and refolding of homo fragments monitored by CD.** Open symbols are the summed scans of the individual N- and C-terminal fragments shown in Fig. 2A and Fig. 2B of the text, respectively. Closed symbols correspond to the physical mixture of the N- and C-fragments (2  $\mu$ M each). Buffer conditions are as described in *Materials and Methods*.

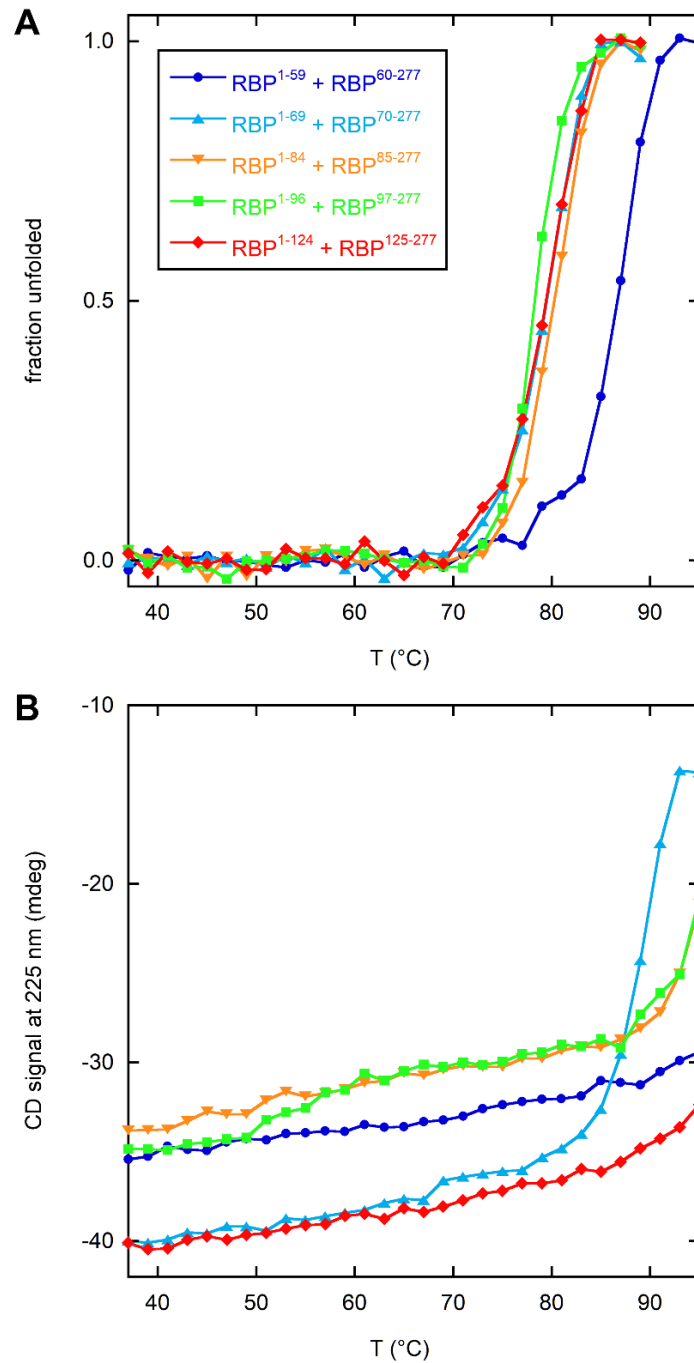

**Fig. S3. Thermal stabilities of homo complexes in the absence (A) and presence (B) of ribose.** In panel A, ellipticity values were converted to fraction unfolded assuming a two-state unfolding model (lines are meant to guide the eye only). Symbols in panel B are identical to those in panel A. Circular dichroism data were recorded at 225 nm in a 1 cm path length cuvette using a heating rate of 10 °C/m. Sample conditions are 1  $\mu$ M protein, 1 mM ribose, 10 mM sodium phosphate (pH 7.0), 0.15 M NaCl, 0.1 mM EDTA.

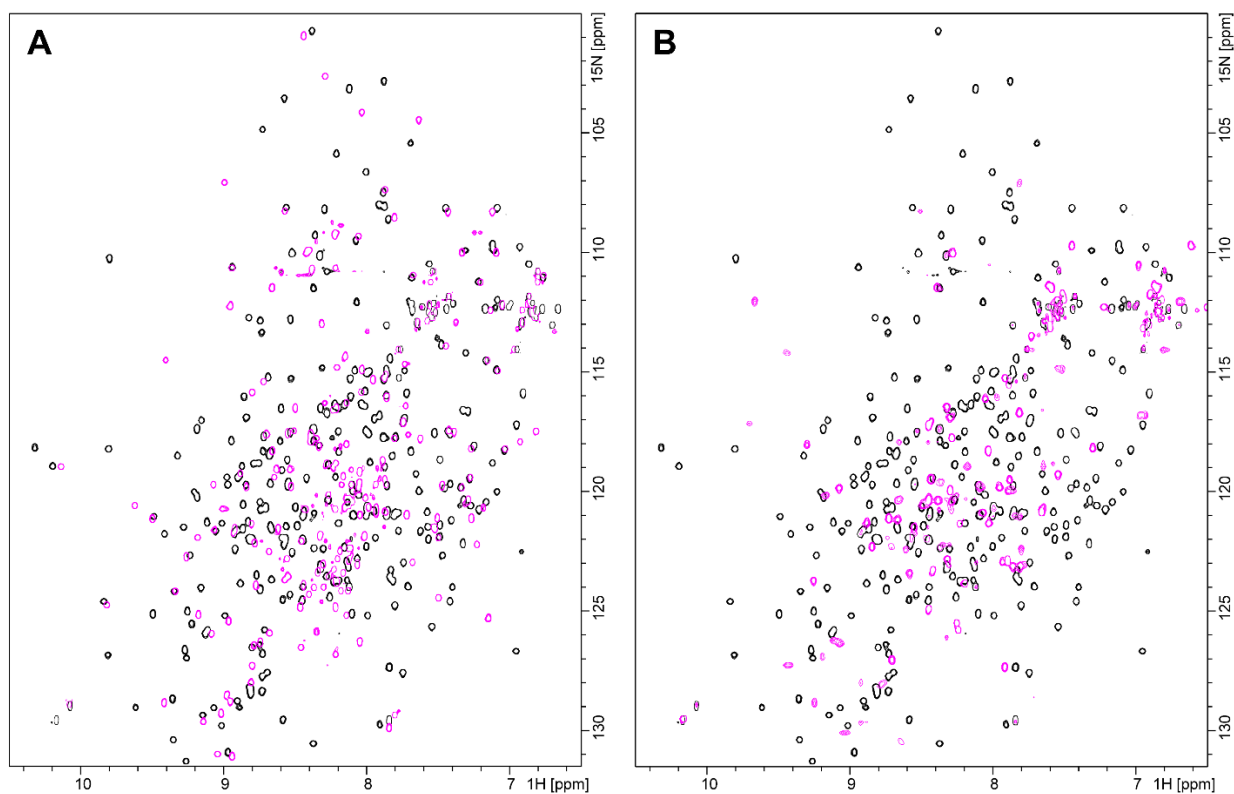

**Fig. S4. 800 MHz  $^{15}\text{N}$ -HSQC NMR spectra of (A) RBP $^{97-277}$  and (B) RBP $^{1-96}$ .** The individual fragments are shown in purple and the complex of RBP $^{1-96}$  + RBP $^{97-277}$  in black. Sample conditions are 1 mM RBP $^{1-96}$ , 1 mM RBP $^{97-277}$ , 0.6 mM RBP $^{1-96}$  + RBP $^{97-277}$ , 20 mM sodium phosphate (pH 7.0), 0.1 M NaCl, 30 °C. The RBP $^{1-96}$  + RBP $^{97-277}$  sample contains 1 mM ribose.
